# Supplementary material for: Synthesis and Transport Properties of ZnSnP2-yAsy Chalcopyrite Solid Solutions
Source: MDPI journal article supplement (doi:10.3390/ma17081712), 2024-04-09
Supplement: s1 [file s1]

# Synthesis and Transport Properties of $\text{ZnSnP}_{2-y}\text{As}_y$ Chalcopyrite Solid Solutions

Daniel Ramirez <sup>1</sup>, Luke T. Menezes <sup>1</sup> and Holger Kleinke <sup>1,\*</sup>

<sup>1</sup> Department of Chemistry and Waterloo Institute for Nanotechnology, University of Waterloo  
 \* Correspondence: kleinke@uwaterloo.ca

## Supplementary information

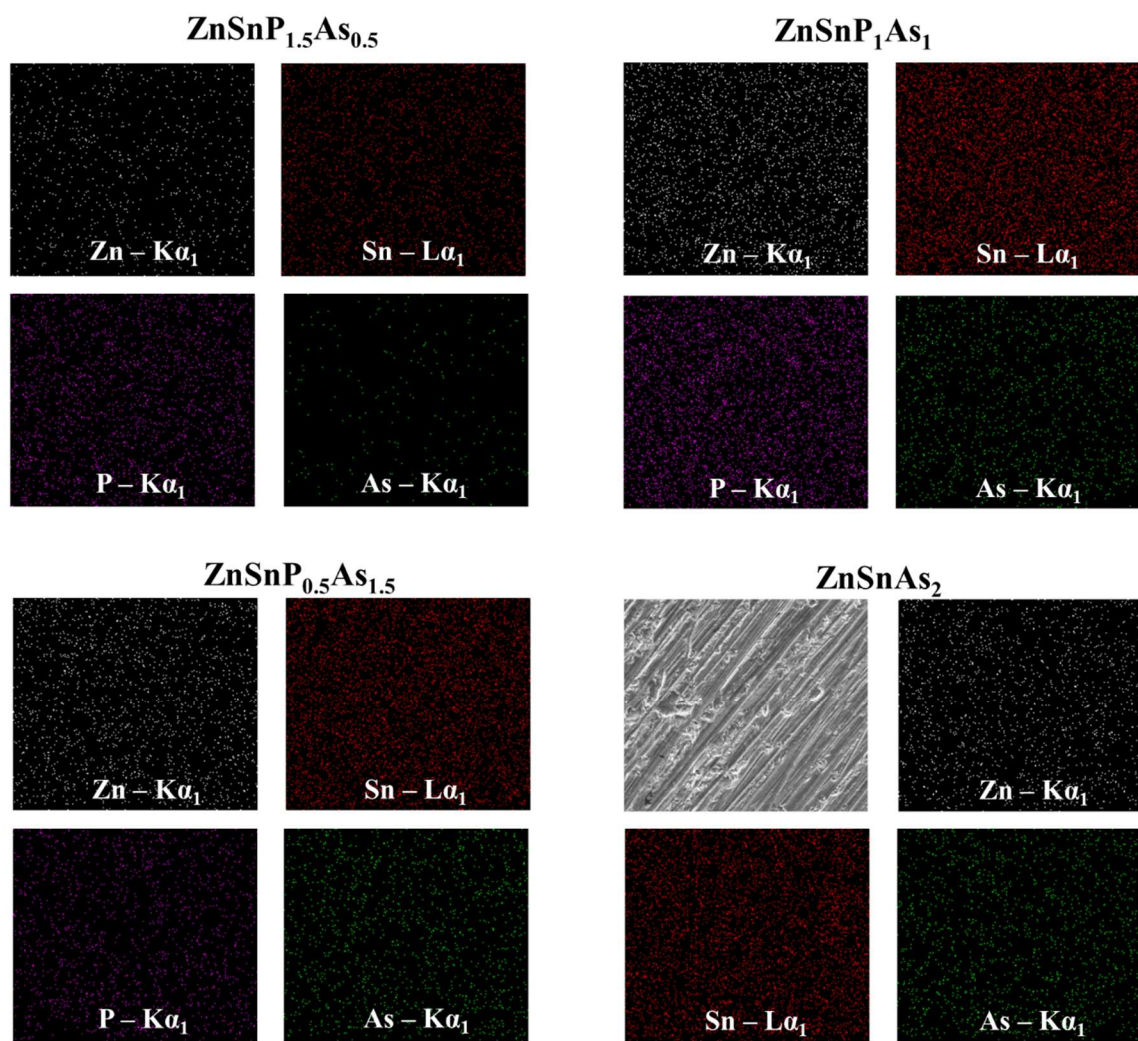

Figure S1: EDAX atomic mapping.
